# Supplementary material for: Rapid synthesis of ultrahigh molecular weight and low polydispersity polystyrene diblock copolymers by RAFT-mediated emulsion polymerization
Source: Royal Society of Chemistry journal article supplement (doi:10.1039/c5py00166h), 2015-01-01
Supplement: c5py00166h1.pdf [file c5py00166h1.pdf]

Supporting information to

**Rapid Synthesis of Ultrahigh Molecular Weight and Low Polydispersity  
Polystyrene Diblock Copolymers by RAFT-mediated Emulsion Polymerization**

Nghia P. Truong,<sup>a</sup> Marion V. Dussert,<sup>a</sup> Michael R. Whittaker,<sup>a</sup> John F. Quinn<sup>\*a</sup> and Thomas P. Davis<sup>\*a,b</sup>

<sup>a</sup>*ARC Centre of Excellence in Convergent Bio-Nano Science & Technology, Monash Institute of Pharmaceutical Sciences, Monash University, Parkville, Melbourne, Victoria 3052, Australia.*

<sup>b</sup>*Department of Chemistry, University of Warwick, Coventry CV4 7AL, United Kingdom.*

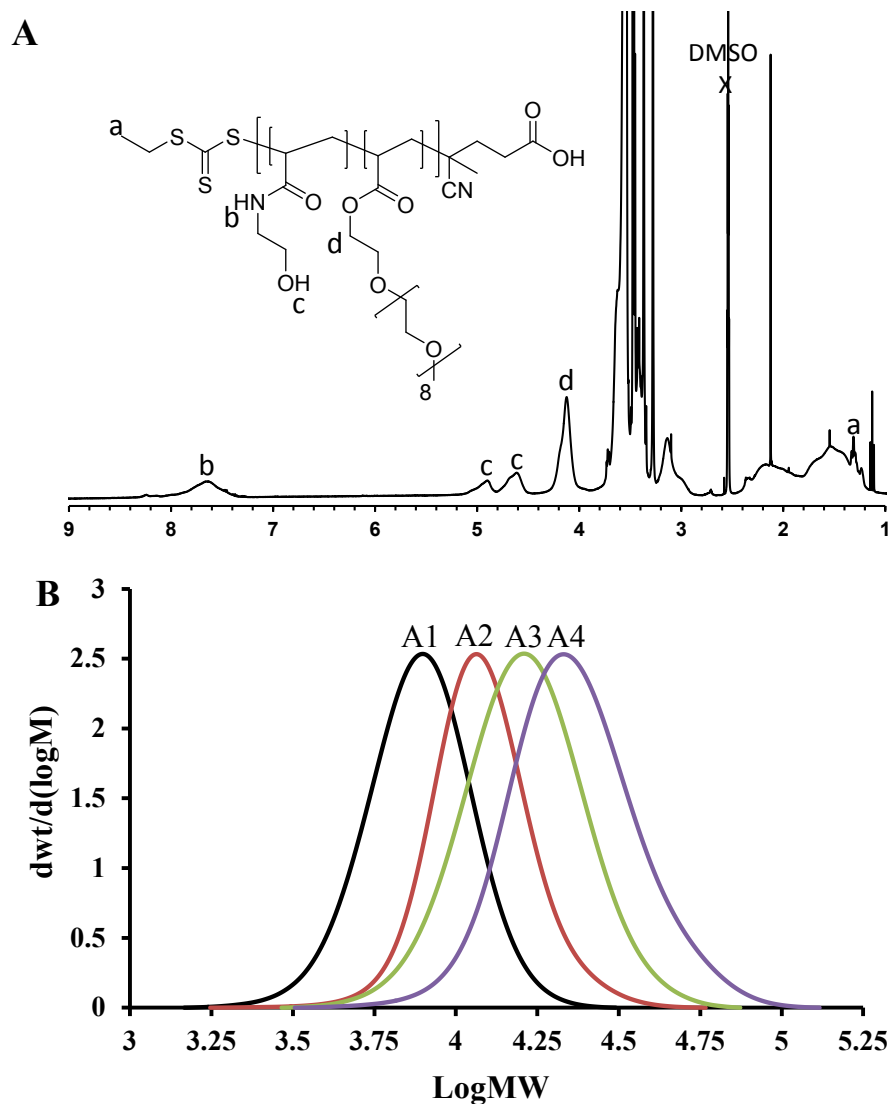

Figure S1. (A)  $^1\text{H}$  NMR of macro-CTA A2 in  $\text{DMSO-d}_6$ , and (B) molecular weight distribution of  $\text{P(PEGA-co-HEAA)-SC(=S)SC}_2\text{H}_5$  macro-CTAs with different molecular weight (A1-A4) polymerized at  $60\text{ }^\circ\text{C}$  in  $\text{DMSO}$  for 7 h using ACPA as an initiator. The intensities for different distribution curves were normalized.

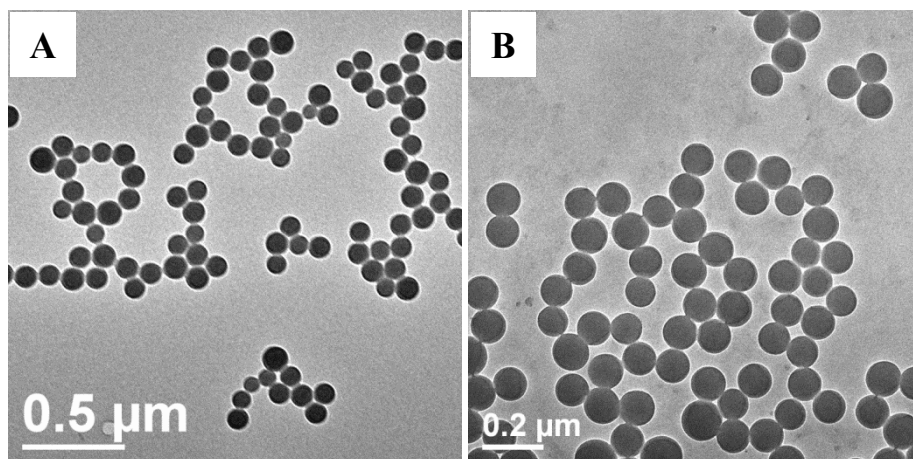

Figure S2. TEM images of particles formed by RAFT-mediated emulsion polymerization of styrene in water at 80 °C for 6 h using P(PEGA<sub>21</sub>-co-HEAA<sub>21</sub>)-SC(=S)SC<sub>2</sub>H<sub>5</sub> (A3) as macro-CTA and ACPA as an initiator: (A) Reaction 1: [Styrene]:[A3]:[I] = 2,790:1:0.3, and (B) Reaction 2: [Styrene]:[A3]:[I] = 5,253:1:0.3.

Figure S3. Molecular weight distribution for the RAFT-mediated emulsion polymerization of styrene in water at 80 °C for 6 h using P(PEGA<sub>21</sub>-co-HEAA<sub>21</sub>)-SC(=S)SC<sub>2</sub>H<sub>5</sub> (A3) as macro-CTA and ACPA as an initiator: (A) Reaction 1: [Styrene]:[A3]:[I] = 2,790:1:0.3, (B) Reaction 2: [Styrene]:[A3]:[I] = 5,253:1:0.3, and (C) Reaction 3: [Styrene]:[A3]:[I] = 11,907:1:0.3.

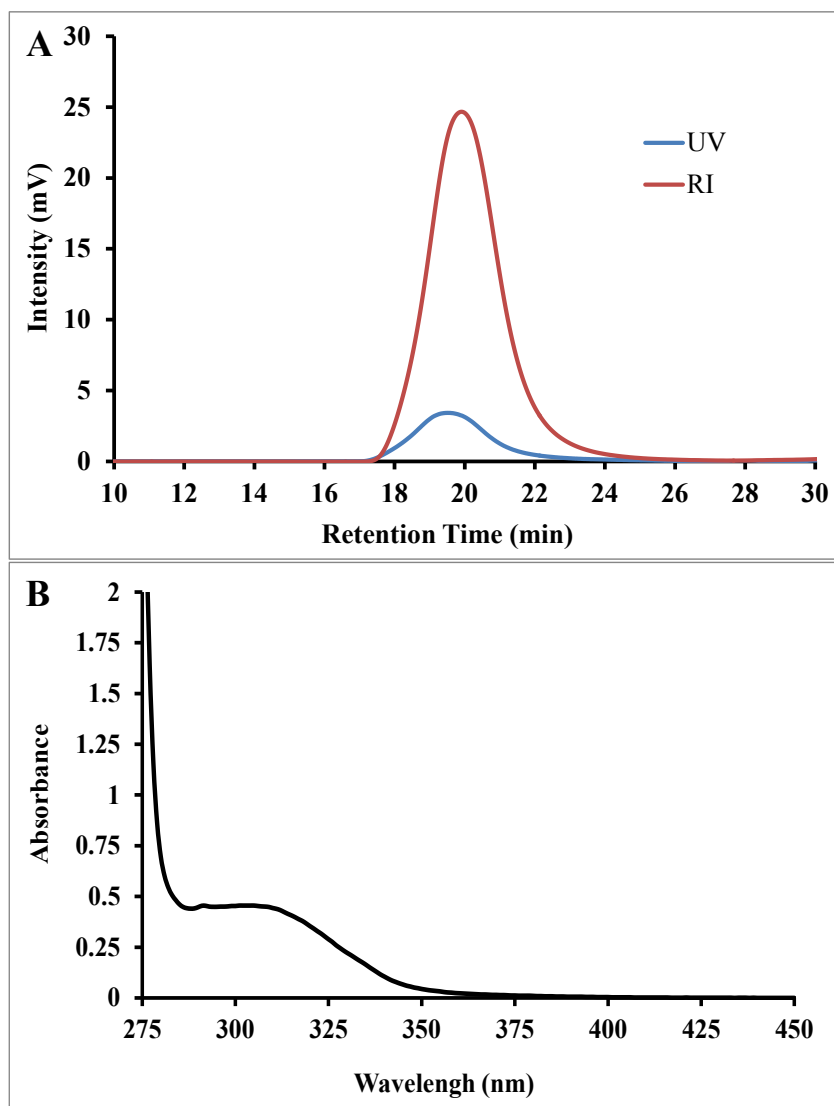

Figure S4. (A) RI and UV vs. retention time and (B) UV-vis spectrum of the product polymer for the RAFT-mediated emulsion polymerization of styrene in water at 80 °C for 6 h using P(PEGA<sub>26</sub>-co-HEAA<sub>25</sub>)-SC(=S)SC<sub>2</sub>H<sub>5</sub> (A4) as macro-CTA and ACPA as initiator.

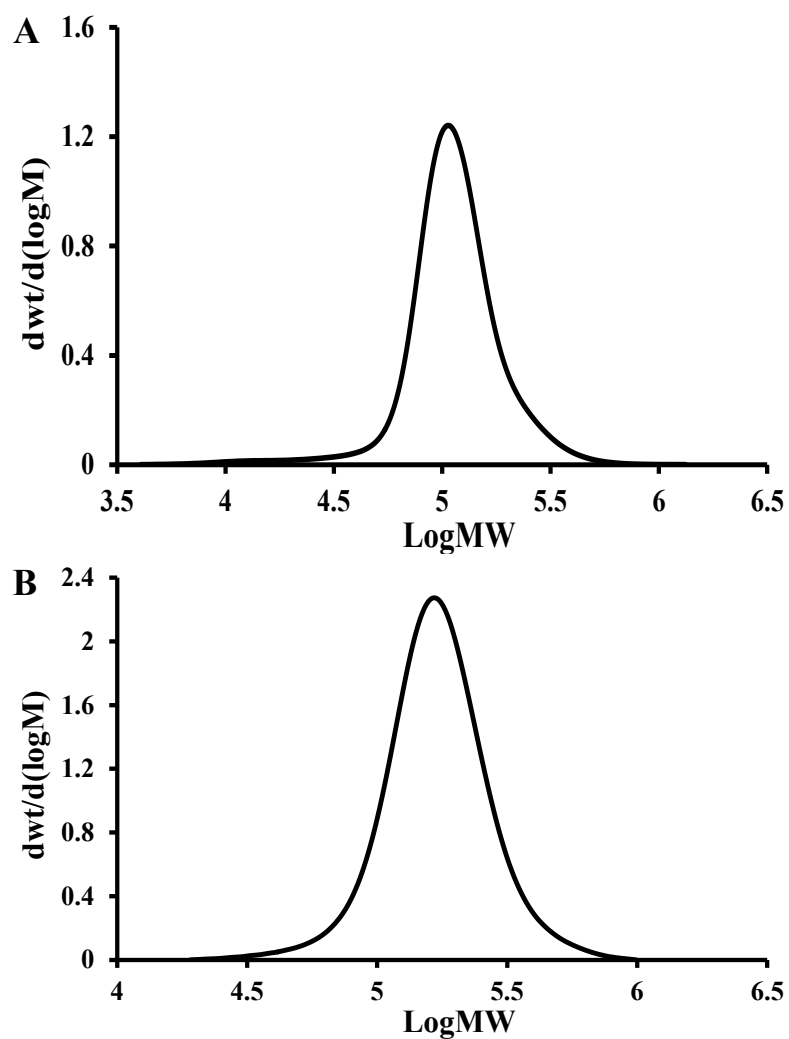

Figure S5. Molecular weight distributions for the RAFT-mediated emulsion polymerization of styrene in water at 80 °C for 6 h using ACPA as initiator and (A) P(PEGA<sub>15</sub>-co-HEAA<sub>15</sub>)-SC(=S)SC<sub>2</sub>H<sub>5</sub> (A2) and (B) P(PEGA<sub>7</sub>-co-HEAA<sub>7</sub>)-SC(=S)SC<sub>2</sub>H<sub>5</sub> (A1) as macro-CTAs.
